# Supplementary material
Source: publisher figshare collection journal article supplement (https://frontiersin.figshare.com/ndownloader/files/13812479)
Supplement: Supplementary file 1 [file 13812479]

## Sheet: S.Table 1
S. Table 1: List of E. faecalis reference genomes
Genome Name	GenBank Accessions	Sequencing Platform	Sequencing Depth	Assembly Method	Contigs	Genome Length	GC Content	Isolation Source	Host Name	Collection Date	Geographic Location
E. faecalis B16457	AIIL00000000	Illumina	129.0x	allpaths v. R41641	13	2993805	37.4	Hospital infection	Human	2007	USA
E. faecalis B1290	AIJH00000000	Illumina	136.0x	allpaths v. R41641	52	3313370	37.1	Blood	Human	1985	USA
E. faecalis B1327	AIJI00000000	Illumina	134.0x	allpaths v. R41641	28	3247914	37.1	Blood	Human	1985	USA
E. faecalis B1376	AIJJ00000000	Illumina	131.0x	allpaths v. R41641	41	3308417	37.1	Blood	Human	1985	USA
E. faecalis B1385	AIJK00000000	Illumina	132.0x	allpaths v. R41641	32	3251074	37.1	Blood	Human	1986	USA
E. faecalis B1441	AIPV00000000	Illumina	153.0x	allpaths v. R43019	31	3245917	37.1	Blood	Human	1986	USA
E. faecalis B1505	AIPW00000000	Illumina	142.0x	allpaths v. R43019	25	3306802	37.1	Blood	Human	1986	USA
E. faecalis B3031	AIRC00000000	Illumina	303.0x	allpaths v. R43019	55	3245232	37	Blood	Human	1987	USA
E. faecalis B3042	AIRD00000000	Illumina	153.0x	allpaths v. R43019	57	3197839	37.1	Blood	Human	1987	USA
E. faecalis B3053	AIRE00000000	Illumina	145.0x	allpaths v. R43019	33	3290460	37.1	Blood	Human	1987	USA
E. faecalis B4568	AIRS00000000	Illumina	290.0x	allpaths v. R41865	37	3227551	37	Blood	Human	1987	USA
E. faecalis B4638	AIRT00000000	Illumina	152.0x	allpaths v. R41865	51	3294027	37	Blood	Human	1987	USA
E. faecalis B4672	AIRU00000000	Illumina	143.0x	allpaths v. R41865	37	3226380	37.1	Blood	Human	1987	USA
E. faecalis B4674	AIRV00000000	Illumina	295.0x	allpaths v. R43019	49	3244688	37	Blood	Human	1987	USA
E. faecalis B4969	AIRW00000000	Illumina	157.0x	allpaths v. R41865	50	3318062	37	Blood	Human	1987	USA
E. faecalis B5076	AIRX00000000	Illumina	309.0x	allpaths v. R41865	29	3071659	37.3	Blood	Human	1987	USA
E. faecalis SF24397	AJAW00000000	Illumina	123.0x	allpaths v. R41985	44	3124375	37.2	Urine	Human	2001	USA: Michigan
E. faecalis SF24413	AJAX00000000	Illumina	144.0x	allpaths v. R41985	35	3185788	37.4	Urine	Human	2002	USA: Michigan
E. faecalis SF26630	AJAY00000000	Illumina	124.0x	allpaths v. R41985	22	3185072	37.5	Urine	Human	2002	USA: Michigan
E. faecalis V587	AJBB00000000	Illumina	147.0x	allpaths v. R41985	41	3294551	37.3	urine	Human	1987	USA: St. Louis, MO
E. faecalis SF28073	AJBC00000000	Illumina	155.0x	allpaths v. R41985	49	3184976	37.2	Urine	Human	2003	USA: Michigan
E. faecalis RM4679	AJBD00000000	Illumina	130.0x	allpaths v. R41985	22	3195563	37.2	Blood		1960s	USA: Boston, MA
E. faecalis CH19	AJBF00000000	Illumina	150.0x	allpaths v. R41985	26	3174296	37.3	Wound	Human	1987	USA: Boston, MA
E. faecalis WH257	AJBG00000000	Illumina	148.0x	allpaths v. R41985	42	3244567	37.1	urine		1987	USA: West Haven, CT
E. faecalis SF19	AJBH00000000	Illumina	119.0x	allpaths v. R41985	33	3181343	37.2	Urine	Human	1980s	USA: Houston, TX
E. faecalis SF1592	AJBI00000000	Illumina	285.0x	allpaths v. R41985	39	3194090	37.1	Clinical isolate	Human	1980s	USA: Delaware
E. faecalis WH571	AJBJ00000000	Illumina	140.0x	allpaths v. R41985	41	3249379	37.1	urine		1986	USA: Connecticut
E. faecalis B5035	AJBK00000000	Illumina	301.0x	allpaths v. R41985	54	3256873	37.1	Blood	Human	1988	USA
E. faecalis MMH594	AJDZ00000000	Illumina	288.0x	allpaths v. R42179	32	3231499	37.1	blood		1985	USA: Wisconsin
E. faecalis SF100	AJEA00000000	Illumina	152.0x	allpaths v. R42179	30	3187571	37.2	Clinical isolate	Human	1980s	USA: California
E. faecalis SF370	AJEB00000000	Illumina	144.0x	allpaths v. R42179	34	3163554	37.2	Clinical isolate	Human	1986	USA: Cleveland, OH
E. faecalis CH570	AJEC00000000	Illumina	144.0x	allpaths v. R42179	29	3211344	37.2	Blood		1987	USA: Canonsburg, PA
E. faecalis SF105	AJEE00000000	Illumina	212.0x	allpaths v. R43019	49	3242544	37.1	Clinical isolate	Human	1980s	USA: California
E. faecalis CH116	AJEG00000000	Illumina	142.0x	allpaths v. R42179	21	3176688	37.3	Fecal	Human	1987-1988	USA: Boston, MA
E. faecalis CH136	AJEH00000000	Illumina	265.0x	allpaths v. R42179	36	3191789	37.2	Urine	Human	1987-1988	USA: Boston, MA
E. faecalis 12107	AJEL00000000	Illumina	145.0x	allpaths v. R42179	22	2866326	37.6	Clinical isolate		mid 1990s	USA: Cleveland, OH
E. faecalis SF24396	AJEM00000000	Illumina	146.0x	allpaths v. R42179	10	2804164	37.6	Urine	Human	2001	USA: Michigan
E. faecalis Pan7	AJEN00000000	Illumina	145.0x	allpaths v. R42179	11	2949470	37.6	commensal	Human	2005	USA: Boston, MA
E. faecalis 5952	AJER00000000	Illumina	130.0x	allpaths v. R42179	24	3093775	37.3	clinical		1975	USA: Ann Arbor, MI
E. faecalis Com1	AJES00000000	Illumina	287.0x	allpaths v. R42682	20	3006140	37.2	commensal	Human	2006	USA: Boston, MA
E. faecalis T15	AJET00000000	Illumina	142.0x	allpaths v. R42179	10	2922169	37.5	wound		1973	USA
E. faecalis E1	AJEU00000000	Illumina	288.0x	allpaths v. R42179	28	3086929	37.3	endocarditis	Human	1960s	USA: Boston, MA
E. faecalis RM3817	AJEV00000000	Illumina	150.0x	allpaths v. R42179	24	3044060	37.5	Blood		1960s	USA: Boston, MA
E. faecalis AZ19	AYLU00000000	Illumina HiSeq	100.0x	Velvet v. 1.2.03; GS De Novo Assembler v.	98	2935290	37.3	aquatic			USA: Arizona
E. faecalis ATCC 51299	JSES00000000	Illumina HiSeq	1377.0x	CLC GENOMICS WORKBENCH v. 6.5.1	70	3232969	37.33	peritoneal fluid	Human	13-Jan-1993	USA:St. Louis
E. faecalis strain ICU1-2c	LQAM00000000	Illumina MiSeq	100.0x	Velvet v. 2.3	14	2929980	37.56	host-2	Human	2014-10-30	USA
E. faecalis strain CU0714	LXID00000000	Illumina MiSeq	42.0x	SPAdes v. MARCH-2016	68	3039735	37.6	blood	Human	23-Jul-14	USA:Aurora, CO
E. faecalis strain FDAARGOS_322	NJFB00000000	PacBio	25.7x	CA v. 8.2	2	3201491	37.21	Urine	Human	21-Dec-2014	USA:DC
E. faecalis strain FDAARGOS_339	NJFK00000000	PacBio	17.3041016177352x	SMRT v. 2.3.0, HGAP v. 3.0	3	3129375	37.22	Stool	Human	06-Mar-2015	USA:DC
E. faecalis strain UBA1299	DBUD00000000	Illumina	6.44x	CLC de novo assembler v. 4.4.1	206	2343871	37.18	metal/plastic	na	na	USA:New York City
E. faecalis strain UBA1501	DCRD00000000	Illumina	12.63x	CLC de novo assembler v. 4.4.1	50	2742682	37.54	metal	na	na	USA:New York City
E. faecalis strain UBA4546	DGLK01000000	Illumina	10.89x	CLC de novo assembler v. 4.4.1	85	2738514	37.31	New York City MTA subway	na	na	USA:New York City
E. faecalis strain UBA4394	DGRG01000000	Illumina	107.24x	CLC de novo assembler v. 4.4.1	30	2758035	37.4	metal/plastic	na	na	USA:New York City
E. faecalis strain UBA5708	DIHA01000000	Illumina	11.29x	CLC de novo assembler v. 4.4.1	44	2695851	37.46	metal	na	na	USA:New York City
E. faecalis strain UBA5642	DIJO01000000	Illumina	25.51x	CLC de novo assembler v. 4.4.1	23	2658827	37.65	metal	na	na	USA:New York City
E. faecalis strain UBA5875	DJFJ01000000	Illumina	22.11x	CLC de novo assembler v. 4.4.1	11	2588391	37.59	metal	na	na	USA:New York City
E. faecalis strain UBA6289	DJUF01000000	Illumina	16.22x	CLC de novo assembler v. 4.4.1	31	2803841	37.46	metal/plastic	na	na	USA:New York City
E. faecalis strain UBA6280	DJUO01000000	Illumina	44.13x	CLC de novo assembler v. 4.4.1	23	2594270	37.7	wood	na	na	USA:New York City
E. faecalis strain UBA6756	DKHA01000000	Illumina	33.43x	CLC de novo assembler v. 4.4.1	120	2568480	37.36	plastic	na	na	USA:New York City
E. faecalis strain UBA7717	DLFP01000000	Illumina	54.9x	CLC de novo assembler v. 4.4.1	199	2448080	36.79	plastic	na	na	USA:New York City
E. faecalis strain UBA7859	DLSP01000000	Illumina	18.29x	CLC de novo assembler v. 4.4.1	65	2737373	37.45	metal/plastic	na	na	USA:New York City
E. faecalis FL2	AYKK00000000	Illumina HiSeq	100.0x	Velvet v. 1.2.03; GS De Novo Assembler v.	119	2665690	37.6	aquatic	na	na	USA: Florida
E. faecalis GA2	AYKL00000000	Illumina HiSeq	100.0x	Velvet v. 1.2.03; GS De Novo Assembler v.	50	2677560	37.6	aquatic	na	na	USA: Georgia
E. faecalis MTmid8	AYKU00000000	Illumina HiSeq	100.0x	Velvet v. 1.2.03; GS De Novo Assembler v.	50	2690460	37.5	aquatic	na	na	USA: Georgia
E. faecalis GAN13	AYLV00000000	Illumina HiSeq	100.0x	Velvet v. 1.2.03; GS De Novo Assembler v.	92	2846920	37.3	aquatic	na	na	USA: Georgia
E. faecalis KS19	AYND00000000	Illumina HiSeq	100.0x	Velvet v. 1.2.03; GS De Novo Assembler v.	94	2740340	37.5	aquatic	na	na	USA: Kansas
E. faecalis MD6	AYLN00000000	Illumina HiSeq	100.0x	Velvet v. 1.2.03; GS De Novo Assembler v.	102	2733190	37.5	aquatic	na	na	USA: Maryland
E. faecalis MN16	AYKM00000000	Illumina HiSeq	100.0x	Velvet v. 1.2.03; GS De Novo Assembler v.	63	2833590	37.3	aquatic	na	na	USA: Minnesota
E. faecalis MTUP9	AYOJ00000000	Illumina HiSeq	100.0x	Velvet v. 1.2.03; GS De Novo Assembler v.	66	2973400	37.1	aquatic	na	na	USA: Montana
E. faecalis NJ44	AYOK00000000	Illumina HiSeq	100.0x	Velvet v. 1.2.03; GS De Novo Assembler v.	129	2913730	37.2	aquatic	na	na	USA: New Jersey
E. faecalis NY9	AYOL00000000	Illumina HiSeq	100.0x	Velvet v. 1.2.03; GS De Novo Assembler v.	113	2983860	37	aquatic	na	na	USA: New York
E. faecalis DORA_14	AZLY00000000	Illumina HiSeq2000	255.03x genomic; 1996.92x plasmid	Velvet v. 1.1	43	2961584	37.3	premature infant gut	Human	2012	USA: Chicago, IL
E. faecalis V583	AE016830,AE016833,AE016831,AE016832	na	na	na	na	3359974	37.4	blood	Human	1987	St. Louis, Missouri
E. faecalis ATCC 29200	AJEK01000000	Illumina	134.0x	allpaths v. R42179	15	3014576	37.42	na	Bacteriophage	1974	Canada: Quebec
E. faecalis CH188	ACAV00000000	454	30.92X	na	19	3209455	37.1	liver	na	na	USA: Boston MA
E. faecalis Fly1	ACAR00000000	454	24.23x	na	9	2831775	37.4	Drosophila	Fruit fly, Drosophila	na	Oklahoma USA
E. faecalis TX0635 = WH245	AJEF00000000	Illumina	144.0x	allpaths v. R42179	36	3224801	37.2	urine	na	1987	USA: West Haven, CT
E. faecalis SF350	ASEN00000000	Illumina	122.0x	allpaths v. R41882	44	3271228	37.1	na	Human	1986
E. faecalis strain F1213D 146	MJEC00000000	Illumina	na	na	34	2913318	37.34	feces	Bos taurus	13-Dec-2004	Canada: Lethbridge
E. faecalis ATCC 35038	ASDE00000000	Illumina	290.0x	allpaths v. R42411	20	2959115	37.5	na	Chicken, Gallus gallus	1980s	na
E. faecalis ATCC 29212	FPEB00000000	Illumina	na	na	40	2972084	37.25	chicken	Chicken	na	na
E. faecalis ATCC 29212	FPDZ00000000	Illumina	na	na	40	2972084	37.25	chicken	Chicken	na	na
na= not applicable
